# Supplementary material for: Facile Obtainment of Fluorescent PEG Hydrogels Bearing Pyrene Groups by Frontal Polymerization
Source: MDPI journal article supplement (doi:10.3390/polym15071687), 2023-03-28
Supplement: s1 [file s1]

Supporting information for:

# Facile Obtainment of Fluorescent PEG Hydrogels Bearing Pyrene Groups by Frontal Polymerization

Ricardo D. Martínez-Serrano <sup>1</sup>, Fabián Cuétara-Guadarrama <sup>1</sup>, Mireille Vonlanthen <sup>1</sup>,  
Javier Illescas <sup>2</sup>, Xiao-Xia Zhu <sup>3</sup> and Ernesto Rivera <sup>1,\*</sup>

<sup>1</sup> Instituto de Investigaciones en Materiales, Universidad Nacional Autónoma de México, Circuito Exterior, Ciudad Universitaria, Mexico City CP 04510, Mexico; ricard-d@hotmail.com (R.D.M.-S.); fabian.cuetara@comunidad.unam.mx (F.C.-G.); mireille.vonlanthen@gmail.com (M.V.)

<sup>2</sup> Tecnológico Nacional de México/Instituto Tecnológico de Toluca, Avenida Tecnológico S/N Col. Agrícola Bellavista, Metepec CP 52149, Mexico; [fillescasm@toluca.tecnm.mx](mailto:fillescasm@toluca.tecnm.mx)

<sup>3</sup> Département de Chimie, Université de Montréal, Succursale Centre-Ville, Montréal, QC H3C 3J7, Canada; julian.zhu@umontreal.ca

\* Correspondence: riverage@unam.mx

## 1. Characterization of the pyrene-containing monomer PybuMA

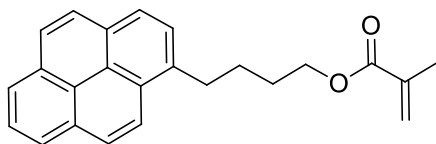

Exact Mass: 342.1620  
Molecular Weight: 342.4303

**Figure S1.** Structure of PybuMA.

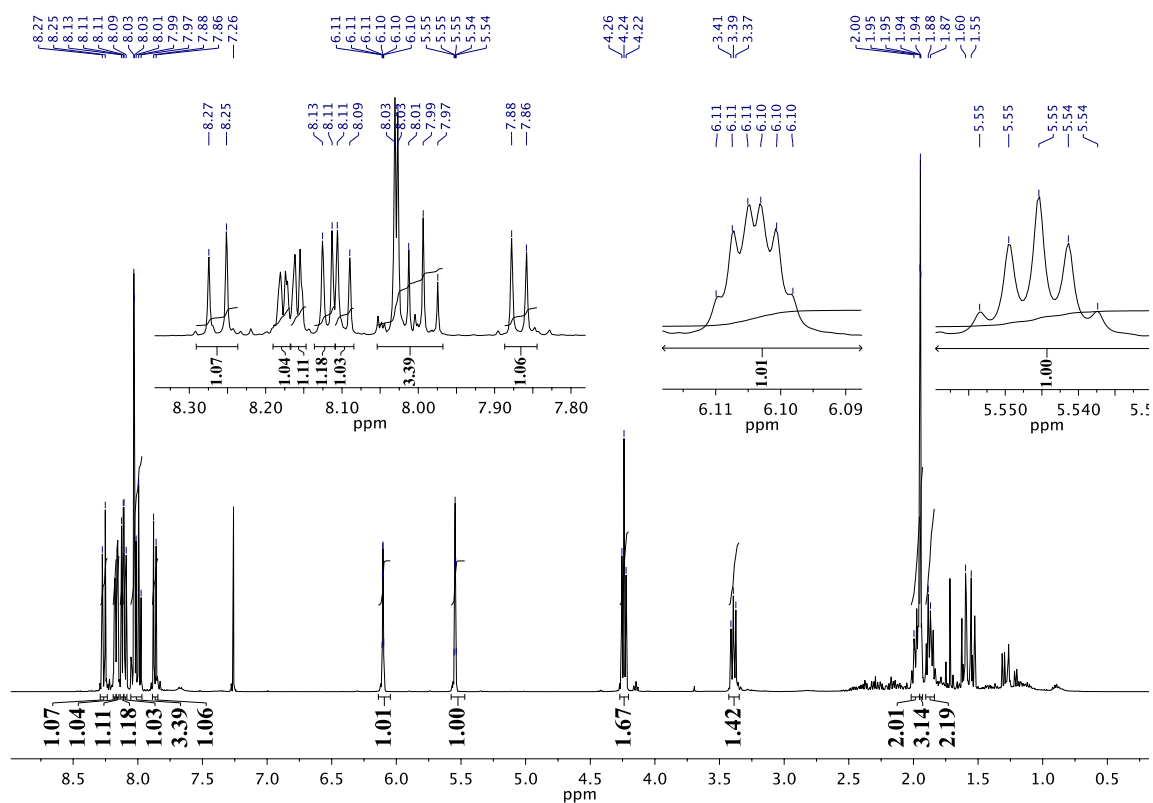

**Figure S2.**  $^1\text{H}$ -NMR spectrum of monomer PybuMA.

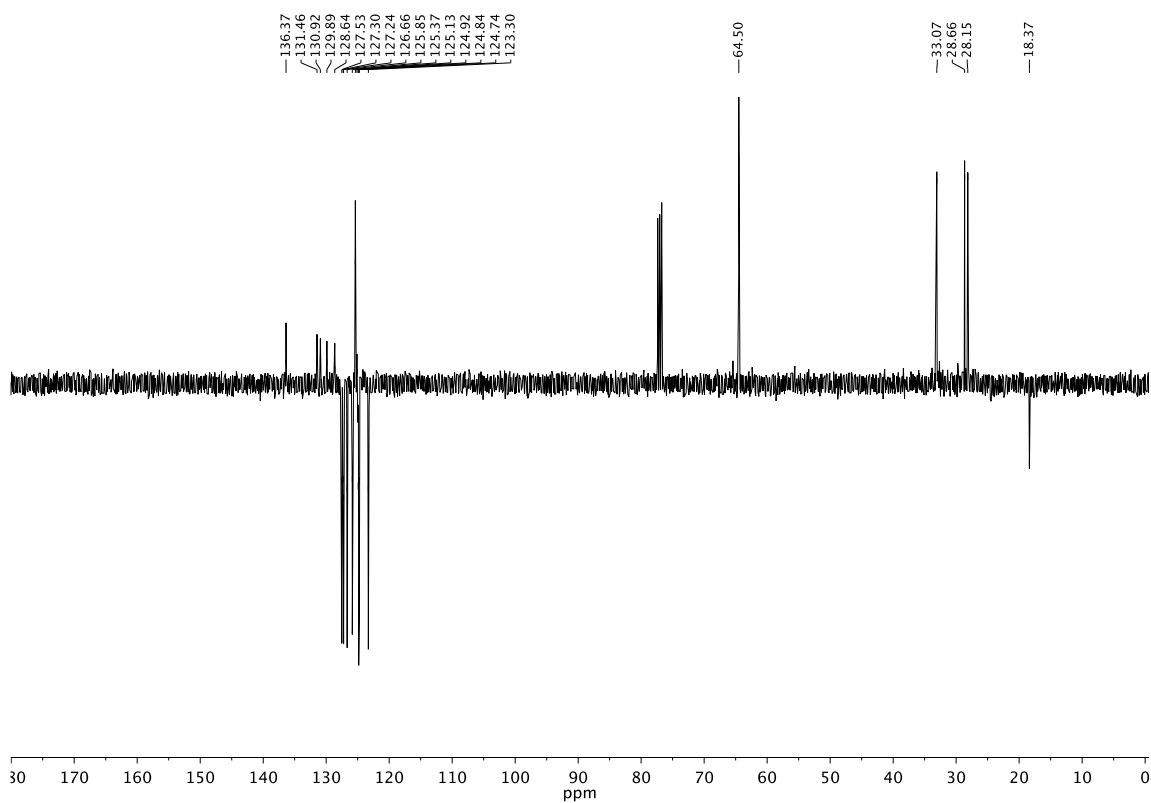

**Figure S3.**  $^{13}\text{C}$ -NMR spectrum of monomer PybuMA.

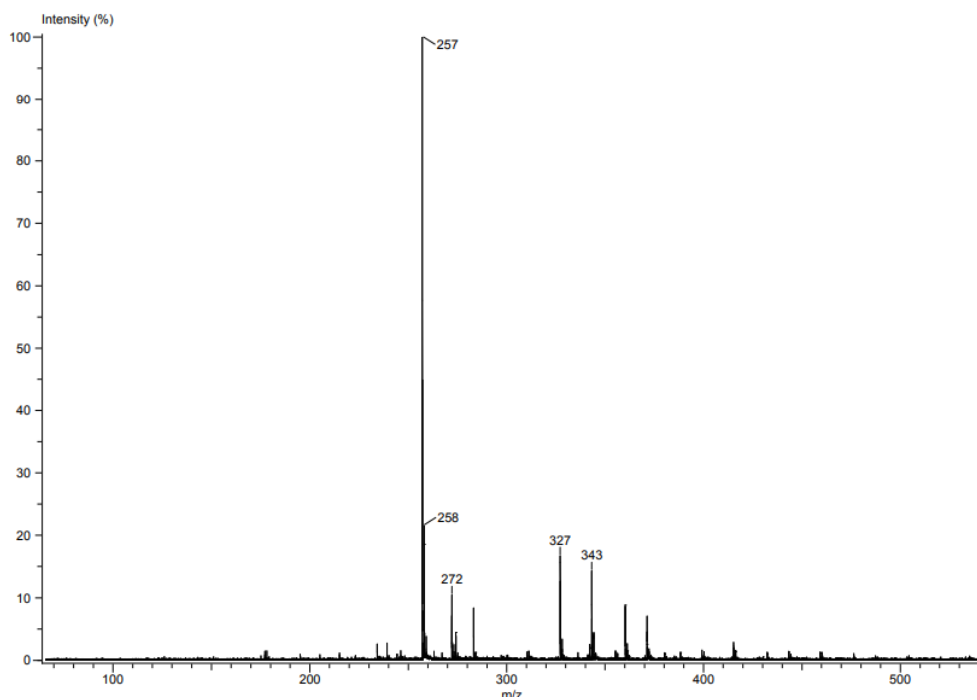

**Figure S4.**  $\text{DART}^+$  mass spectrum of monomer PybuMA.

## 2. TGA measurements.

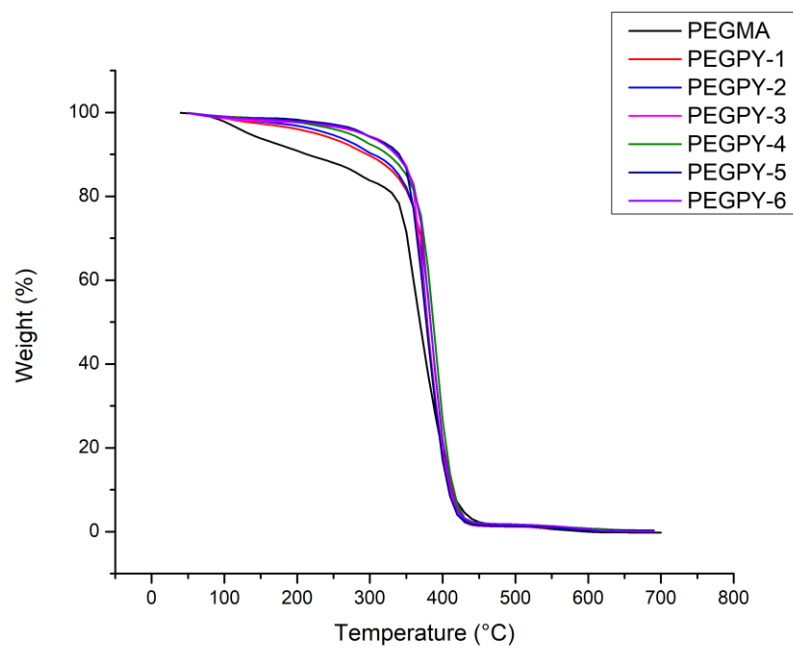

**Figure S5.** TGA curves of the PEGPy polymer series.
